# Supplementary material
Source: PubMed Central journal article supplement (PMC2952562)

Figure B

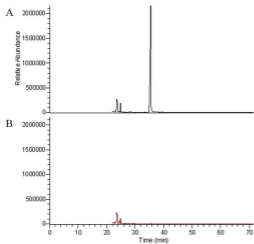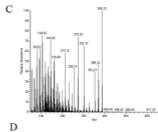

Supplement: supp_M007518_jlr.M007518-2.pdf [file supp_M007518_jlr.M007518-2.pdf]

Figure C

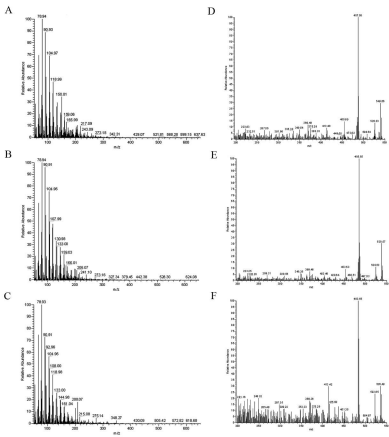

Supplement: supp_M007518_jlr.M007518-3.pdf [file supp_M007518_jlr.M007518-3.pdf]

Figure D

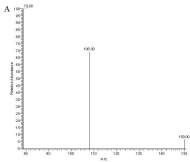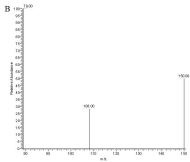

Supplement: supp_M007518_jlr.M007518-4.pdf [file supp_M007518_jlr.M007518-4.pdf]
